# Supplementary material for: Intestinal commensal microbiota and cytokines regulate Fut2+ Paneth cells for gut defense
Source: PubMed Central journal article supplement — Proc Natl Acad Sci U S A. 2022 Jan 13;119(3):e2115230119. doi: 10.1073/pnas.2115230119 (PMC8784097; doi:10.1073/pnas.2115230119), 2022-01-13
Supplement: pnas.2115230119.sapp.pdf [file pnas.2115230119.sapp.pdf]

1  
2

# PNAS

[www.pnas.org](http://www.pnas.org)

3 Supplementary Information for

4  
5 Title: Intestinal commensal microbiota and cytokines regulate Fut2<sup>+</sup> Paneth cells for gut defense

6  
7 Author list:

8 Mariko Kamioka<sup>1-4</sup>, Yoshiyuki Goto<sup>2,5</sup>, Kiminori Nakamura<sup>6</sup>, Yuki Yokoi<sup>6</sup>, Rina Sugimoto<sup>6</sup>, Shuya  
9 Ohira<sup>6</sup>, Yosuke Kurashima<sup>1-4,7</sup>, Shingo Umemoto<sup>1,3,8</sup>, Shintaro Sato<sup>1,9,10</sup>, Jun Kunisawa<sup>2,4</sup>, Yu  
10 Takahashi<sup>11</sup>, Steven E. Domino<sup>12</sup>, Jean-Christophe Renaud<sup>13</sup>, Susumu Nakae<sup>14</sup>, Yoichiro Iwakura<sup>15</sup>,  
11 Peter B. Ernst<sup>3, 16-18</sup>, Tokiyoshi Ayabe<sup>6</sup> and Hiroshi Kiyono<sup>1-3,18\*</sup>

12 1 Department of Mucosal Immunology, IMSUT Distinguished Professor Unit, The Institute of Medical  
13 Science, The University of Tokyo, Tokyo 108-8639, Japan.

14 2 International Research and Development Center for Mucosal Vaccines, The Institute of Medical  
15 Science, The University of Tokyo, Tokyo 108-8639, Japan.

16 3 Department of Medicine, School of Medicine and Chiba University-UCSD Center for Mucosal  
17 Immunology, Allergy and Vaccine (CU-UCSD cMAV), University of California San Diego, CA 92093,  
18 USA.

19 4 Laboratory of Vaccine Materials, Center for Vaccine and Adjuvant Research and Laboratory of Gut  
20 Environmental System, National Institutes of Biomedical Innovation, Health and Nutrition (NIBIOHN),  
21 Osaka 567-0085, Japan.

22 5 Division of Molecular Immunology, Medical Mycology Research Center, Chiba University, Chiba  
23 260-8673, Japan.

24 6 Department of Cell Biological Science, Graduate School of Life Science, Faculty of Advanced Life  
25 Science, Hokkaido University, Hokkaido 001-0021, Japan.

26 7 Department of Innovative Medicine, Graduate School of Medicine, Chiba University, Chiba 260-  
27 8670, Japan.

- 28 8 Department of Otolaryngology & Head and Neck Surgery, Faculty of Medicine, Oita University, Oita  
29 879-5593, Japan
- 30 9 Mucosal Vaccine Project, BIKEN Innovative Vaccine Research Alliance Laboratories, Research  
31 Institute for Microbial Diseases, Osaka University, Osaka 565-0871, Japan.
- 32 10 Department of Immunology and Genomics, Osaka City University Graduate School of Medicine,  
33 Osaka 545-8585, Japan.
- 34 11 Food Biochemistry Laboratory, Department of Applied Biological Chemistry, Graduate School of  
35 Agricultural and Life Sciences, The University of Tokyo, Tokyo 113-8657, Japan.
- 36 12 Department of Obstetrics and Gynecology, Cellular and Molecular Biology Program, University of  
37 Michigan Medical Center, Ann Arbor, MI 48109-5617, USA.
- 38 13 Ludwig Institute for Cancer Research and Université Catholique de Louvain, Brussels B-1200,  
39 Belgium.
- 40 14 Graduate School of Integrated Sciences for Life, Hiroshima University, Hiroshima 739-8528, Japan.
- 41 15 Center for Experimental Animal Models, Institute for Biomedical Sciences, Tokyo University of  
42 Science, Chiba 278-0022, Japan.
- 43 16 Division of Comparative Pathology and Medicine, Department of Pathology, University of  
44 California San Diego, CA, 92093, USA.
- 45 17 Center for Veterinary Sciences and Comparative Medicine, University of California, CA, 92093,  
46 USA.
- 47 18 Future Medicine Education and Research Organization, Department of Immunology, Graduate  
48 School of Medicine, Chiba University, Chiba 260-8670, Japan.

49

50 Corresponding author: Hiroshi Kiyono

51 Email: [kiyono@ims.u-tokyo.ac.jp](mailto:kiyono@ims.u-tokyo.ac.jp)

52

53 **This PDF file includes:**

54

55 Supplementary text

56 Fig. S1 to S12

57 Supplementary Table

58 Movie legends for Supplemental Video 1, 2

59 SI References

60

## 61 **Materials and Methods**

62

### 63 **Immunohistochemistry**

64 Small intestine was flushed several times with cold phosphate-buffered saline (PBS), fixed  
65 in 4% paraformaldehyde for 15 h at 4°C, and embedded in paraffin (Wako) or OCT compound (Sakura  
66 Finetek). Then, 5- $\mu$ m-thick tissue sections were prepared by following standard protocols. For *in vitro*  
67 study, organoids were fixed in 4% paraformaldehyde for 30 min at room temperature and then  
68 incubated in 0.1% Triton X (Nacalai Tesque) and 5% goat serum in PBS to increase cell membrane  
69 permeability. Samples were then treated with purified anti-CD16/CD32 antibody (as Fc block; BD  
70 Pharmingen) and incubated with fluorescein isothiocyanate-labeled or tetramethylrhodamine B  
71 isothiocyanate-labeled *Ulex europaeus* agglutinin 1 (UEA-1) (Vector) to detect  $\alpha$ (1,2)fucose. To  
72 detect Paneth cells, samples were incubated with unlabeled polyclonal rabbit anti-lysozyme antibody  
73 (DakoCytomation) for 15 h at 4°C. After washing with PBS, unlabeled anti-lysozyme antibody-treated  
74 samples were stained with Alexa Fluor 647-labeled anti-rabbit IgG (Jackson ImmunoResearch  
75 Laboratories, Inc.). To detect the plasma membrane, samples were incubated with mouse anti-E-  
76 cadherin antibody (BD Transduction Laboratories). After incubation and washing with PBS, samples  
77 were incubated with Alexa Fluor 594-labeled anti-mouse IgG (Thermo Fisher) as the secondary  
78 antibody. To detect  $\alpha$ -defensin, samples were incubated with anti- $\alpha$ -defensin monoclonal antibody  
79 (clone 77-R63(1)). After incubation and washing with PBS, samples were incubated with Alexa Fluor  
80 488-labeled anti-rat IgG (Jackson ImmunoResearch Laboratories, Inc.) as the secondary antibody.  
81 After counterstaining with 4',6-diamidino-2-phenylindole (DAPI; Sigma-Aldrich), the specimens were  
82 examined under a confocal laser scanning microscope (LSM 800 with Airyscan, ZEISS; TCS SP2,  
83 Leica; or BZ-9000, Keyence).

84

### 85 **Cell preparation and flow cytometry**

86 Crypt region cells were isolated from small intestine as previously described(2). Isolated  
87 small intestines were opened longitudinally, washed with cold PBS, cut into 5-mm pieces, and then  
88 washed again three times with cold PBS. Tissue fragments were incubated in PBS containing 2 mM  
89 EDTA for 30 min on ice, vigorously shaken in cold PBS to remove villi, and suspended in cold PBS  
90 by using a 10-mL pipette. Tissue fragments were removed with a 70- $\mu$ m cell strainer (Falcon). The  
91 supernatant, which was enriched for crypts, was passed through a 70- $\mu$ m cell strainer to remove the  
92 remaining villi. Isolated crypts were pelleted by centrifugation at 200g for 5 min; suspended in fresh,  
93 cold PBS; and stained with (i) Pacific Blue-labeled anti-CD45 antibody (BioLegend) to identify and  
94 eliminate hematopoietic cells from analysis, (ii) allophycocyanin-labeled anti-CD24 antibody  
95 (BioLegend) to identify the Paneth cell-enriched population(3), and (iii) tetramethylrhodamine B  
96 isothiocyanate-labeled UEA-1 to detect  $\alpha$ (1,2)fucose. Peridinin-chlorophyll-protein-labeled Via-  
97 Probe solution (BD Bioscience) was used to discriminate between dead and living cells.

98

### 99 **Detection of *Fut2* expression by X-gal staining**

100 *Fut2* promoter activity in frozen sections of small intestine in *Fut2<sup>LacZ/+</sup>* mice was examined  
101 by using an X-gal staining kit (Invitrogen). When  $\beta$ -galactosidase is produced by the LacZ gene under  
102 the control of the *Fut2* promoter, X-gal (an analog of lactose) is hydrolyzed to produce a blue pigment.  
103 Therefore, cells with an active *Fut2* promoter were identified as blue-colored cells(4).

104

105 **Measurement of Paneth cell granule size**

106 Tissue sections were prepared as described in **Immunohistochemistry** in the main  
107 manuscript. Paneth cell eosinophilic granules were stained with hematoxylin and eosin as described  
108 previously(5). For frozen sections, granules in Paneth cells (lysozyme<sup>+</sup> cells) were detected and their  
109 size was measured by using ImageJ software(6).

110

111 **Analysis of purified Fut2<sup>+</sup> Paneth cells and Fut2<sup>-</sup> Paneth cells**

112 For the analysis of purified Fut2<sup>+</sup> Paneth cells and Fut2<sup>-</sup> Paneth cells shown in Fig. 2d-f and  
113 Fig. S1, crypt cells were incubated with Zinpyr-1 (Santa Cruz Biotechnology) to detect Paneth cells  
114 and with DyLight 649–labeled UEA-1 (Vector) to detect  $\alpha(1,2)$ fucose. A JSAN cell sorter was used  
115 for transcriptomics analysis and data collection, and the AppSan software was used for data analysis  
116 (Bay Bioscience). Fut2<sup>-</sup> Paneth cells (as Zinpyr-1<sup>+</sup> UEA-1<sup>-</sup> cells) and Fut2<sup>+</sup> Paneth cells (as Zinpyr-  
117 1<sup>+</sup> UEA-1<sup>+</sup> cells) were isolated from the ileum of Fut1-deficient mice (Fig. S1). Total RNA was isolated  
118 from Fut2<sup>-</sup> and Fut2<sup>+</sup> Paneth cells by using a PureLink RNA Micro Kit (Invitrogen), and DNA  
119 contamination was eliminated with PureLink DNase (Invitrogen). A complementary DNA (cDNA)  
120 library was prepared by using a SMART-Seq v4 Ultra Low Input RNA Kit for Sequencing (Clontech).  
121 Adapters were ligated onto both ends of the cDNA fragments. Both ends of the cDNA was sequenced  
122 using a NovaSeq 6000 Sequencing System (Illumina).

123

124 **Preparation of mouse intestinal organoids and treatment with cytokines**

125 Small-intestinal crypts were isolated from 8 to 12-week-old mice and the organoids were  
126 prepared as described previously(7). The organoids were cultured in Matrigel (BD Biosciences) and  
127 treated with mL-22 (R&D Systems) (1, 10, and 100 ng/mL) for two days. The cultures were then  
128 washed with PBS and treated with cell recovery solution (BD Biosciences) for 30 min on ice. The  
129 recovered organoids were collected by centrifugation at 440g for 5 min.

130

131 **Preparation of fecal samples**

132 Fecal samples were prepared as previously described(8). Samples were air-dried overnight,  
133 powdered by using a bead beater–type homogenizer (Beads Crusher  $\mu$ T-12; TAITEC), and then  
134 dissolved in PBS for 1 h at 4°C. After centrifugation at 20,000g for 20 min, the supernatant was  
135 collected to measure  $\alpha$ -defensin concentration.

136

137 **Enzyme-linked immunosorbent assay**

138 Sandwich enzyme-linked immunosorbent assay was performed as previously described(8).  
139 One-hundred-microliter aliquots of fecal samples or intestinal organoid culture medium were added  
140 to wells coated with 1  $\mu$ g/mL  $\alpha$ -defensin monoclonal antibody (clone 77R-5)(1) and incubated at 25°C  
141 for 2 h. After washing in PBS-Tween, 100  $\mu$ L of 0.5  $\mu$ g/mL biotinylated detection antibody (clone 77R-  
142 20)(1) was added at 25°C for 1 h. Then, the wells were incubated with 100  $\mu$ L of streptavidin–  
143 horseradish peroxidase conjugate (GE Healthcare Biosciences) at 25°C for 1 h. After a final wash,  
144 100  $\mu$ L of 3,3',5,5'-tetramethylbenzidine chromogen substrate buffer was added and the wells were  
145 incubated at 25°C for 30 min. The reaction was stopped by addition of 100  $\mu$ L of 0.6 N H<sub>2</sub>SO<sub>4</sub>, and

146 absorbance values were determined at 450 nm by using a microplate reader (Multiskan FC, Thermo  
147 Fisher Scientific).

148

#### 149 **Visualization and quantification of Paneth cell granule secretion**

150 Paneth cell granule secretion was visualized and quantified as previously described(9).  
151 Briefly, intestinal organoids were released from Matrigel by incubating the whole Matrigel in Cell  
152 Recovery Solution (Corning) on ice for 5 min. After washing with cold Advanced DMEM/F12, intestinal  
153 organoids were transferred to a collagen-coated 8-well chamber slide (Matsunami) at 100 intestinal  
154 organoids per well. Differential interference contrast images of Paneth cells before and 10 min after  
155 stimulation with 0.1  $\mu$ M Carbamyl choline (CCh) were obtained by using a confocal microscope (A1,  
156 Nikon). Paneth cell granule secretion was quantified by measuring granule area using the NIS-  
157 Elements AR software (ver.5.11, Nikon).

158

#### 159 **Fecal microbiota transplantation**

160 Fecal microbiota transplantation (FMT) was performed as reported previously(10). In short,  
161 mice were given ampicillin (1 g/L; Nacalai Tesque, Kyoto, Japan) in their drinking water for 7 days.  
162 One day before FMT, the ampicillin-containing water was replaced with sterile water. Fecal pellets  
163 were obtained from Fut2-deficient mice or IL-22-deficient mice or their littermate wild-type mice. After  
164 homogenizing one or two of the fecal pellets in 1 mL of water, the supernatants were orally  
165 administered to the ampicillin-treated mice. Feces were then collected from the recipient mice each  
166 week for five weeks after fecal transfer and the  $\alpha$ -defensin concentration in the feces was determined  
167 by enzyme-linked immunosorbent assay.

168

#### 169 **Transmission electron microscopy analysis**

170 Ileum was fixed at room temperature for 2 h in a solution containing 2.5% glutaraldehyde, 2%  
171 paraformaldehyde, and 0.05 M cacodylate buffer (pH 7.4). After being washed with cacodylate buffer  
172 three times on ice, the samples were fixed in 2% osmium tetroxide on ice for 2 h and dehydrated  
173 sequentially with 30%, 50%, 70%, and 90% ethanol for 5 min at each strength. Dehydrated samples  
174 were treated with propylene oxide twice for 5 min and then embedded in Epon812 resin mixture  
175 (TAAB Laboratories). Ultra-thin sections (70 nm) stained with 2% uranyl acetate and Reynolds lead  
176 solution were examined under a Hitachi H-7500 electron microscope.

177

#### 178 **Isolation of lamina propria cells**

179 After removal of Peyer's patches, the duodenum and ileum were opened longitudinally and  
180 washed several times with ice-cold PBS. The duodenum and ileum were then cut into 1-cm pieces,  
181 which were incubated in 1 mM EDTA in PBS at 37 °C for 15 min with gentle shaking to remove  
182 epithelial cells, as previously described(11-13). The remaining tissues were finely minced and stirred  
183 for 30 min in RPMI-1640 Media (Thermo Fisher Scientific) containing 2% fetal calf serum and  
184 0.5 mg/mL collagenase (Sigma-Aldrich); this process was repeated three times using fresh fetal calf  
185 serum and collagenase. The suspension was passed through a cell strainer (70- $\mu$ m pore size) to  
186 remove undigested debris, the filtrate was centrifuged at 1,700 rpm for 5 min, and the resulting pellet  
187 of lamina propria cells was washed with RPMI-1640 containing 2% fetal calf serum. Finally, RNA was

188 isolated from the lamina propria cells and used for real-time reverse-transcription polymerase chain  
189 reaction analysis.

190

### 191 **Isolation of RNA and real-time reverse-transcription polymerase chain reaction analysis**

192 Total RNA from tissue and organoids was isolated with TRIzol reagent (Invitrogen) and  
193 cDNA was synthesized from the RNA by using a SuperScript VILO cDNA Synthesis Kit (Invitrogen).  
194 The specific primers (Hokkaido System Science, Co., Ltd) and universal probes (Roche) used for the  
195 real-time reverse-transcription polymerase chain reaction (RT-PCR) were as follows: *Fut2* (forward  
196 [F], 5'-gcggttcgctccattccta-3'; reverse [R], 5'-aaaggtacctgggcactcg-3', probe No.76), *Lyz1* (F, 5'-  
197 ggcaaaacccaagatctaa-3'; R, 5'-tctctcaccaccctcttgc-3', probe No.46), *Rab1b* (F, 5'-  
198 gtcaggagcgggttcagga-3'; R, 5'-ttcacggtggcgtaggact-3', probe No.11), *Rab3d* (F, 5'-  
199 aagtgtgacctggaagacgaa-3'; R, 5'-gctggcctcaagaactcaa-3', probe No.62), *Rab8a* (F, 5'-  
200 tcaaagcaaaaatggacaaaa-3'; R, 5'-tccactgtgatcttgactccat-3', probe No.32), *Rab26* (F, 5'-  
201 tcctggctgtaccttcac-3'; R, 5'-gccatccacatccagaactt-3', probe No.105), *Rab27a* (F, 5'-  
202 cctgcagttatgggacacg-3'; R, 5'-ccctgaagaatgcagtggtt-3', probe No.51), *Rab37* (F, 5'-  
203 ccaaccagtctcttttgaca-3'; R, 5'-ccacgtctctctgggcatac-3', probe No.100), *Gapdh* (F, 5'-  
204 tgtccgctgtggatctgac-3'; R, 5'-cctgctcaccaccttctg-3', probe No.80). RT-PCR analysis was performed  
205 with a LightCycler II Instrument (Roche Diagnostics) to measure gene expression levels. For *IL-17a*,  
206 a set of specific primers (F, 5'-tttaactccctggcgcaaaa-3'; R, 5'-ctttccctccgcattgacac-3'), 2x SYBR  
207 Green qPCR Master Mix (Bimake), and a StepOne Real-Time PCR System (Thermo Fisher Scientific)  
208 were used.

209

210 **Figures**  
211

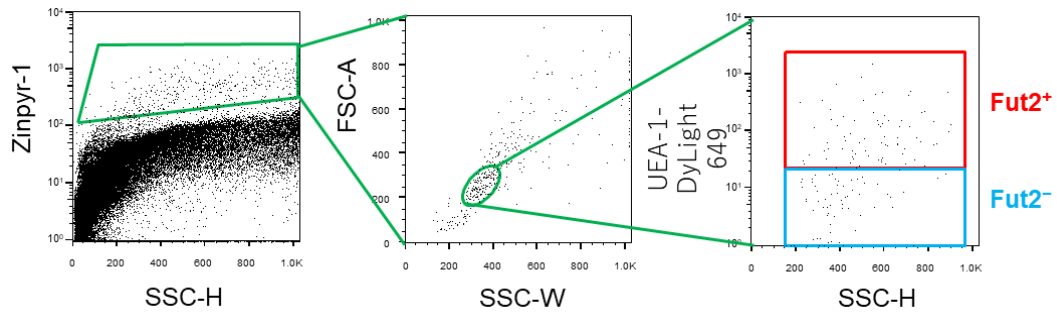

212

213 **Fig. S1. Gating strategy for flow cytometric analysis and isolation of Fut2<sup>+</sup> and Fut2<sup>-</sup> Paneth**  
214 **cells**

215 Zinpyr-1<sup>+</sup> cells were gated to obtain a highly purified fraction of Paneth cells, which was then gated  
216 using forward scatter area (FSC-A) and side scatter width (SSC-W) to obtain single Paneth cells.  
217 From the single Paneth cells, *Ulex europaeus* agglutinin-1–positive (UEA-1<sup>+</sup>) cells were gated as  
218 Fut2<sup>+</sup> Paneth cells and UEA-1<sup>-</sup> cells were gated as Fut2<sup>-</sup> Paneth cells. SSC-H, side scatter height.

219

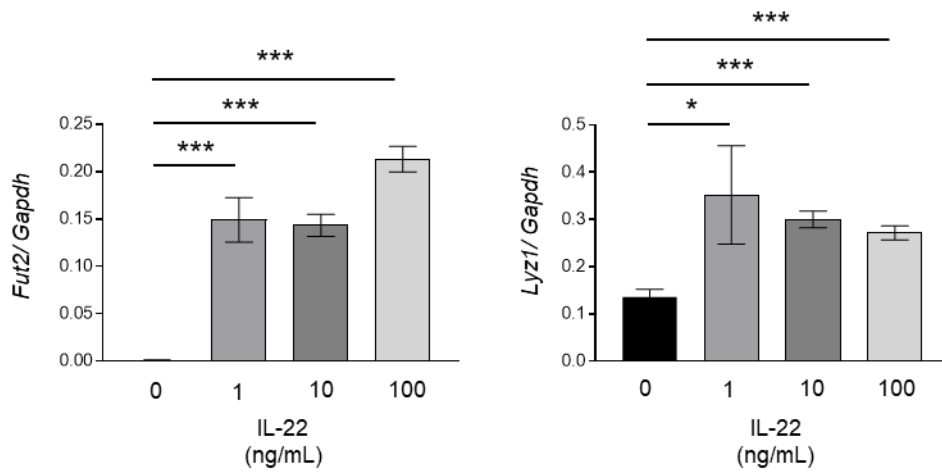

220 **Fig. S2. Interleukin (IL) 22 induces upregulation of *Fut2* and *Lyz1* expression in organoids**  
 221 **derived from duodenum of wild-type mice**

222 Reverse-transcription polymerase chain reaction analysis of *Fut2* and *Lyz1* expression (relative to  
 223 *Gapdh* expression) in organoids derived from duodenum of wild-type mice treated with the indicated  
 224 concentrations of recombinant murine IL-22. Data are presented as mean  $\pm$  SD (triplicate). \* $P < 0.05$ ,  
 225 \*\*\* $P < 0.001$ , Student's *t*-test. Data are representative of two independent experiments.

226



227

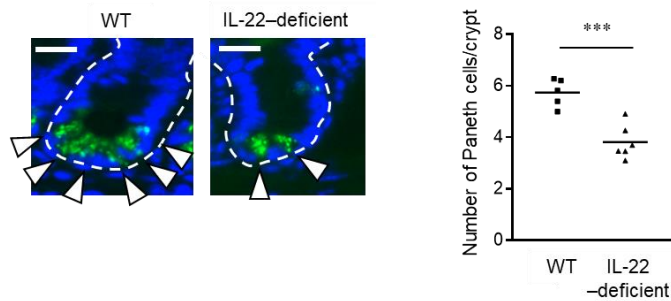

228 **Fig. S3. Number of Paneth cells per crypt in ileum of wild-type (WT) and interleukin (IL) 22-**  
229 **deficient mice**

230 Sections of ileum of WT and IL-22-deficient mice were stained with anti-lysozyme antibody (green)  
231 and DAPI (counterstain; blue) and the number of Paneth cells per crypt was counted. Left: White  
232 arrows indicate Paneth cells; white dotted lines delineate crypts. Bars: 20  $\mu$ m. Right: Ten to fifteen  
233 crypts per mouse were examined. Five WT mice and six IL-22-deficient mice were analyzed.  
234 Horizontal lines indicate means. \*\*\* $P < 0.001$ , Student's  $t$ -test.

235

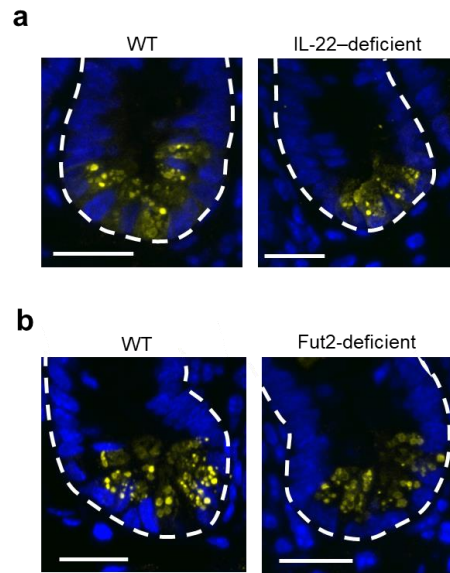

236

237 **Fig. S4. Interleukin (IL) 22-deficient mice and Fut2-deficient mice express  $\alpha$ -defensin in their**  
238 **Paneth cells**

239 Sections of ileum from a) wild-type (WT) mice and IL-22-deficient mice and b) WT mice and Fut2-  
240 deficient mice were stained with anti- $\alpha$ -defensin (yellow) and DAPI (blue). White dotted lines delineate  
241 crypts. Bars: 20  $\mu$ m. Images are representative of three independent experiments.

242

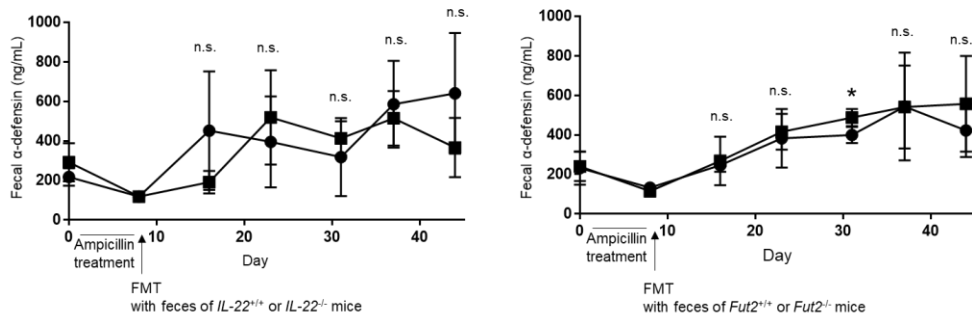

243

244 **Fig. S5. α-Defensin concentration in the feces of mice after receiving fecal microbiota**  
 245 **transplantation (FMT)**

246 Mice were orally administered ampicillin for 7 days. On day 9, the mice were orally administered feces  
 247 from interleukin 22 (IL-22)–deficient mice or Fut2-deficient mice or their littermate wild-type mice (IL-  
 248 22<sup>+/+</sup> or Fut2<sup>+/+</sup>). Feces were collected at week 1–5 after fecal transfer. α-Defensin concentration in  
 249 the feces of FMT mice was measured by enzyme-linked immunosorbent assay. Circles, FMT mice  
 250 that received with feces from WT mice. Squares, FMT mice that received feces from gene-deficient  
 251 mice. Each group is  $n = 5$ . Error bars represent standard deviation of the mean. \* $P < 0.05$ , n.s., not  
 252 significant, Student's  $t$ -test.

253

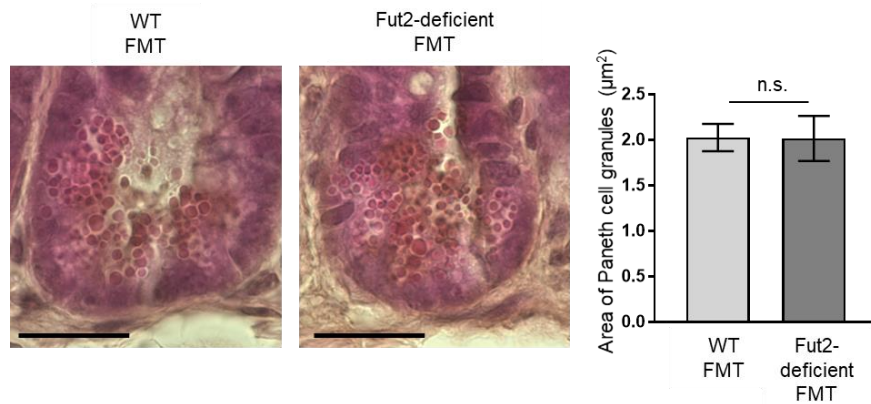

254

255 **Fig. S6. Size of Paneth cell granules in fecal microbiota transplantation (FMT) mice**

256 Mice were orally administered ampicillin for 7 days. On day 9, mice were orally administered feces  
 257 from wild-type (WT) or Fut2-deficient mice. On day 45, FMT mice were sacrificed and subjected to  
 258 hematoxylin and eosin staining to detect Paneth cell granules. Left: Bars = 20 µm. Right: Ten crypts  
 259 per mouse were examined, and Paneth cell granule area was measured with the ImageJ software(6).  
 260 Three mice per group were analyzed. Representative images are shown. Data are presented as  
 261 mean ± SD. n.s., not significant, Student's *t*-test.

262

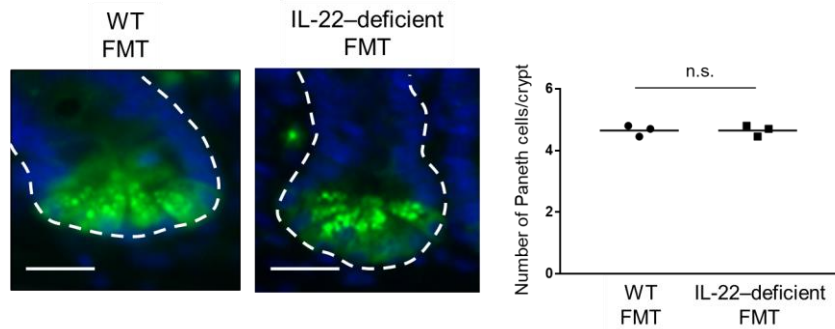

263

264 **Fig. S7. Number of Paneth cells per crypt in ileum of fecal microbiota transplantation (FMT)**  
 265 **mice**

266 Mice were orally administered ampicillin for 7 days. On day 9, mice were orally administered feces  
 267 from wild-type (WT) or IL-22-deficient mice. On day 45, FMT mice were sacrificed and subjected to  
 268 immunohistological analysis to detect Paneth cells. Sections of ileum of FMT mice treated with feces  
 269 from WT or IL-22-deficient mice were stained with anti-lysozyme antibody (green) and DAPI  
 270 (counterstain; blue) and the number of Paneth cells per crypt was counted. Left: White arrows indicate  
 271 Paneth cells; white dotted lines delineate crypts; bars = 20  $\mu$ m. Right: Twenty crypts per mouse were  
 272 examined. Three mice per group were analyzed. Horizontal lines indicate means. n.s., not significant,  
 273 Student's *t*-test.

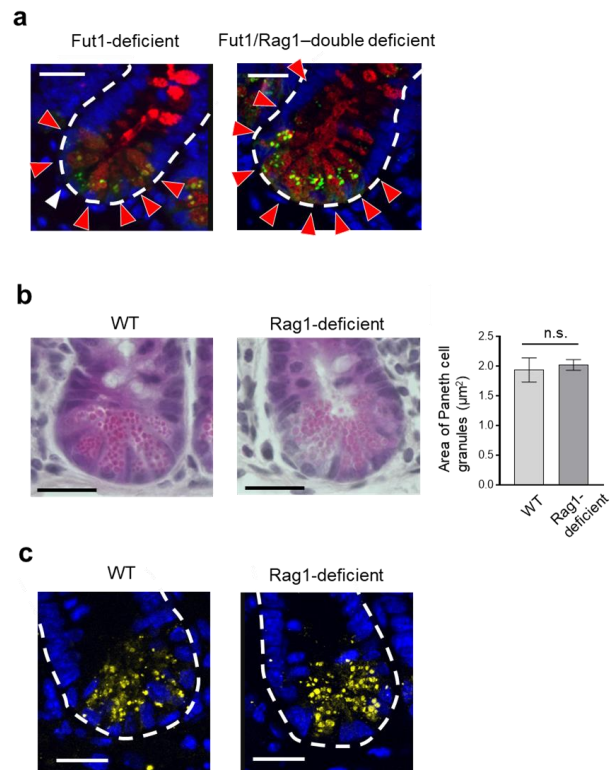

275

276 **Fig. S8. Rag1-deficient mice possess Fut2<sup>+</sup> Paneth cells and granules expressing  $\alpha$ -defensin**  
 277 **in their Paneth cells**

- 278 a) Sections of ileum from Fut1-deficient mice and Fut1/Rag1-double deficient mice were stained  
 279 with *Ulex europaeus* agglutinin-1 (UEA-1; red), anti-lysozyme antibody (green), and DAPI  
 280 (counterstain; blue). Red arrows, lysozyme<sup>+</sup> UEA-1<sup>+</sup> cells; white arrow, lysozyme<sup>+</sup> UEA-1<sup>-</sup> cell;  
 281 white dotted lines delineate crypts. Bars: 20  $\mu$ m. Data are representative of three independent  
 282 experiments.
- 283 b) Sections of ileum from wild-type (WT) ( $n = 3$ ) and Rag1-deficient ( $n = 3$ ) mice were subjected to  
 284 hematoxylin and eosin staining to detect Paneth cell granules. Representative images are shown.  
 285 Bars: 20  $\mu$ m. Paneth cell granule area was measured in 10 crypts per mouse with the ImageJ  
 286 software(6). Data are presented as mean  $\pm$  SD. n.s., not significant, Student's *t*-test.
- 287 c) Sections of ileum from WT and Rag1-deficient mice were stained with anti- $\alpha$ -defensin (yellow)  
 288 and DAPI (counterstain; blue). White dotted lines delineate crypts. Bars: 20  $\mu$ m. Images are  
 289 representative of three independent experiments.  
 290

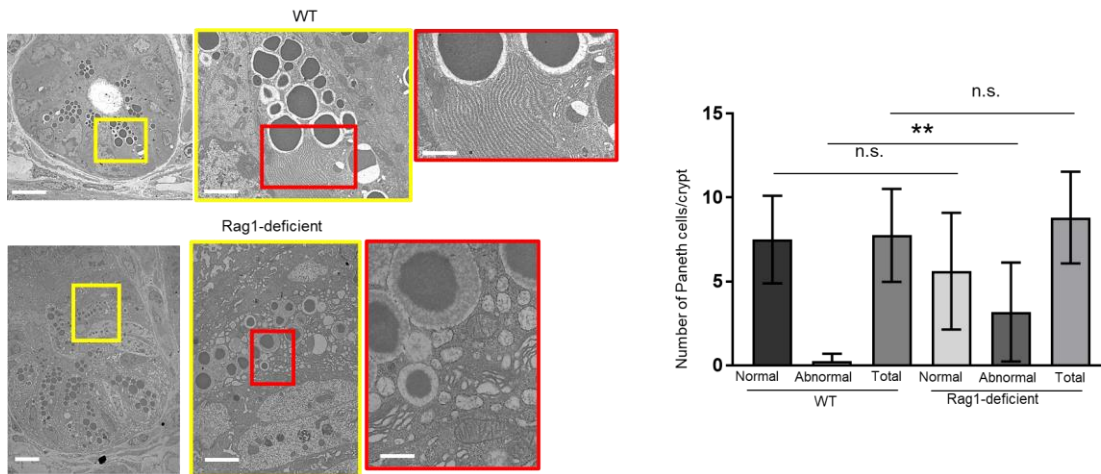

291

292 **Fig. S9. Intracellular structure of crypt epithelial cells from wild-type (WT) and Rag1-deficient**  
 293 **mice**

294 Intracellular structure of crypt epithelial cells from WT and Rag1-deficient mice was analyzed by  
 295 transmission electron microscopy. Bars: upper row: low magnification, 10 μm; medium magnification  
 296 (yellow box), 2.5 μm; high magnification (red box), 1.3 μm; lower row: 10 μm, 2.9 μm, and 667 nm,  
 297 respectively. Three to nine crypts from each type of mouse were observed per experiment. Images  
 298 are representative of three independent experiments. Numbers of normal and abnormal Paneth cells  
 299 per crypt were counted in 12 ileal crypts pooled from 3 WT mice, and 21 ileal crypts pooled from 3  
 300 Rag1-deficient mice. Data are presented as mean ± SD. \*\**P* < 0.01, Student's *t*-test. n.s., not  
 301 significant.

302

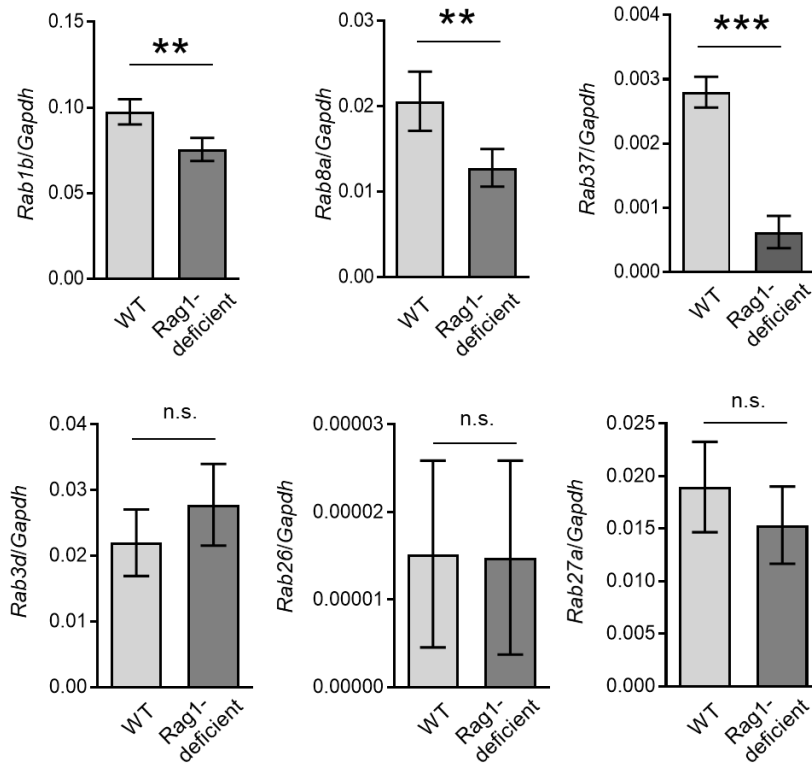

303

304 **Fig. S10. Expression of Rab-family genes in ileal crypts of wild-type (WT) and Rag1-deficient**  
 305 **mice**

306 Reverse-transcription polymerase chain reaction analysis of *Rab1b*, *Rab8a*, *Rab37*, *Rab3d*, *Rab26*,  
 307 and *Rab27a* expression (relative to *Gapdh* expression) in ileal crypts isolated from WT and Rag1-  
 308 deficient mice. Data are presented as mean  $\pm$  SD (WT mice,  $n = 5$ ; Rag1-deficient mice,  $n = 5$ ). \*\* $P$   
 309  $< 0.01$  and \*\*\* $P < 0.001$ , n.s., not significant, Student's  $t$ -test.

310



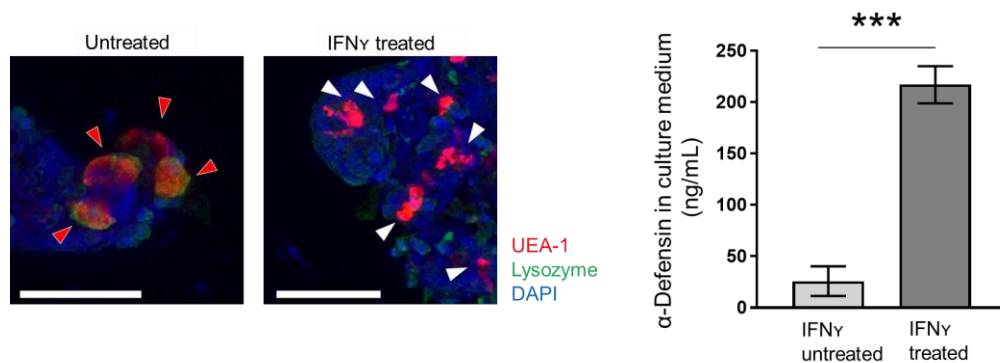

311

312 **Fig. S11. Interferon gamma (IFN $\gamma$ ) triggers degranulation of Paneth cells**

313 Organoids derived from duodenum of wild-type mice were treated with 5 ng/mL recombinant murine  
 314 IFN $\gamma$ . Samples were stained with *Ulex europaeus* agglutinin-1 (UEA-1; red), anti-lysozyme antibody  
 315 (green), and DAPI (counterstain; blue). In a report by another group(14) UEA-1 was used to stain  
 316 Paneth cell granules. Red arrows indicate lysozyme<sup>+</sup> UEA-1<sup>+</sup> cells that possess granules; white  
 317 arrows indicate granule release into the crypt lumen. Bars: 50  $\mu$ m. Data are representative of three  
 318 independent experiments.  $\alpha$ -Defensin concentration in the intestinal organoid culture medium was  
 319 measured by enzyme-linked immunosorbent assay. Intestinal organoids derived from WT mice were  
 320 treated with 5 ng/mL recombinant IFN $\gamma$  for 2 days. Four samples per group were analyzed. Data are  
 321 presented as mean  $\pm$  SD; \*\*\* $P$  < 0.001, Student's  $t$ -test.

322

323

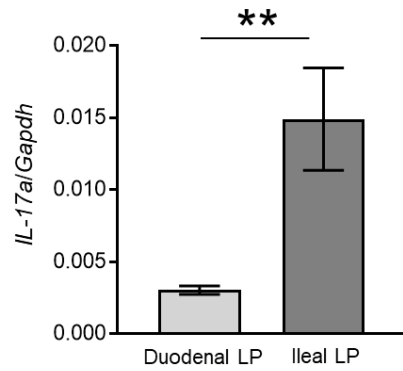

324

325 **Fig. S12. Expression of *IL-17a* in duodenal and ileal lamina propria (LP) cells**

326 Reverse-transcription polymerase chain reaction analysis of *IL-17a* expression (relative to *Gapdh*  
327 expression) in duodenal and ileal LP cells isolated from wild-type mice. Samples were obtained in  
328 triplicate per group. Data are presented as mean  $\pm$  SD; \*\* $P < 0.01$ , Student's *t*-test. Data are  
329 representative of three independent experiments.

330

331 **Supplementary Table. Differentially Expressed Gene Analysis of Fut2<sup>+</sup> Paneth Cells and**  
 332 **Fut2<sup>-</sup> Paneth Cells**  
 333

| Gene_ID | Transcript_ID                    | Gene_Symbol    | Description                                                      | Fut2 <sup>+</sup> /Fut2 <sup>-</sup> Fold change |
|---------|----------------------------------|----------------|------------------------------------------------------------------|--------------------------------------------------|
| 226413  | NM_001081078                     | <i>Lct</i>     | lactase                                                          | 3.783418                                         |
| 216019  | NM_145419                        | <i>Hkdc1</i>   | hexokinase domain containing 1                                   | 2.063588                                         |
| 232714  | NM_001171003                     | <i>Mgam</i>    | maltase-glucoamylase                                             | 3.260019                                         |
| 69983   | NM_001081137                     | <i>Sis</i>     | sucrase isomaltase (alpha-glucosidase)                           | 4.666254                                         |
| 209558  | NM_134005                        | <i>Enpp3</i>   | ectonucleotide pyrophosphatase/phosphodiesterase 3               | 3.601038                                         |
| 229927  | NM_139148                        | <i>Clca3b</i>  | chloride channel accessory 3B                                    | 2.115127                                         |
| 23844   | NM_017474                        | <i>Clca1</i>   | chloride channel accessory 1                                     | 3.965978                                         |
| 99709   | NM_001033199                     | <i>Clca4b</i>  | chloride channel accessory 4B                                    | 3.125216                                         |
| 16440   | NM_080553                        | <i>Itp3</i>    | inositol 1,4,5-triphosphate receptor 3                           | 2.231498                                         |
| 18797   | NM_001290349,NM_008874           | <i>Plcb3</i>   | phospholipase C, beta 3                                          | 2.119382                                         |
| 11421   | NM_001281819,NM_009598,NM_207624 | <i>Ace</i>     | angiotensin I converting enzyme (peptidyl-dipeptidase A) 1       | 2.065865                                         |
| 16535   | NM_008434                        | <i>Kcnq1</i>   | potassium voltage-gated channel, subfamily Q, member 1           | 2.085866                                         |
| 99663   | NM_207208                        | <i>Clca4a</i>  | chloride channel accessory 4A                                    | 2.721231                                         |
| 12638   | NM_021050                        | <i>Cftr</i>    | cystic fibrosis transmembrane conductance regulator              | 2.230965                                         |
| 13487   | NM_021353                        | <i>Slc26a3</i> | solute carrier family 26, member 3                               | 2.244970                                         |
| 27409   | NM_031884                        | <i>Abcg5</i>   | ATP-binding cassette, sub-family G (WHITE), member 5             | 2.043424                                         |
| 76408   | NM_029600                        | <i>Abcc3</i>   | ATP-binding cassette, sub-family C (CFTR/MRP), member 3          | 2.111202                                         |
| 20537   | NM_019810                        | <i>Slc5a1</i>  | solute carrier family 5 (sodium/glucose cotransporter), member 1 | 2.430809                                         |
| 105243  | NM_001081060                     | <i>Slc9a3</i>  | solute carrier family 9 (sodium/hydrogen exchanger), member 3    | 2.030977                                         |
| 18703   | NM_011082                        | <i>Pigr</i>    | polymeric immunoglobulin receptor                                | 2.675044                                         |

334  
 335  
 336

337 **Supplemental Video 1: Paneth cell granule secretion in untreated or Interleukin (IL) 22 treated**  
 338 **organoids**

339 Time-lapse images of Paneth cells in untreated or IL-22 treated organoids were taken by confocal  
 340 microscopy after adding 0.1 μM carbamylcholine to the culture medium. Bars: 10 μm. Real acquisition  
 341 time are represented by h:mm:ss (hour:minute:second).

342

343 **Supplemental Video 2: Paneth cell granule secretion in organoids derived from wild-type (WT)**  
 344 **and Fut2-deficient mice**

345 Time-lapse images of Paneth cells in organoids derived from WT and Fut2-deficient mice were taken  
 346 by confocal microscopy after adding 0.1 μM carbamylcholine to the culture medium. Bars: 10 μm.  
 347 Real acquisition time are represented by h:mm:ss (hour:minute:second).

348  
 349

350 **References**

351

352 1 Eriguchi Y, *et al.* (2015) Decreased secretion of Paneth cell alpha-defensins in graft-versus-  
353 host disease. *Transpl Infect Dis* 17(5):702-706.

354 2. Sato T, *et al.* (2011) Paneth cells constitute the niche for Lgr5 stem cells in intestinal  
355 crypts. *Nature* 469(7330):415-418.

356 3. Wong VW, *et al.* (2012) Lrig1 controls intestinal stem-cell homeostasis by negative  
357 regulation of ErbB signalling. *Nat Cell Biol* 14(4):401-408.

358 4. Domino SE & Hurd EA (2004) LacZ expression in Fut2-LacZ reporter mice reveals estrogen-  
359 regulated endocervical glandular expression during estrous cycle, hormone replacement,  
360 and pregnancy. *Glycobiology* 14(2):169-175.

361 5. Rubio CA & Nesi G (2003) A simple method to demonstrate normal and metaplastic  
362 Paneth cells in tissue sections. *In Vivo* 17(1):67-71.

363 6. Schneider CA, Rasband WS, & Eliceiri KW (2012) NIH Image to ImageJ: 25 years of image  
364 analysis. *Nat Methods* 9(7):671-675.

365 7. Takahashi Y, *et al.* (2017) Reciprocal Inflammatory Signaling Between Intestinal Epithelial  
366 Cells and Adipocytes in the Absence of Immune Cells. *EBioMedicine* 23:34-45.

367 8. Nakamura K, Sakuragi N, & Ayabe T (2013) A monoclonal antibody-based sandwich  
368 enzyme-linked immunosorbent assay for detection of secreted alpha-defensin. *Anal*  
369 *Biochem* 443(2):124-131.

370 9. Yokoi Y, *et al.* (2019) Paneth cell granule dynamics on secretory responses to bacterial  
371 stimuli in enteroids. *Sci Rep* 9(1):2710.

372 10. Matsuo K, *et al.* (2019) Fecal microbiota transplantation prevents *Candida albicans* from  
373 colonizing the gastrointestinal tract. *Microbiol Immunol* 63(5):155-163.

374 11. Terahara K, *et al.* (2011) Distinct fucosylation of M cells and epithelial cells by Fut1 and  
375 Fut2, respectively, in response to intestinal environmental stress. *Biochem Biophys Res*  
376 *Commun* 404(3):822-828.

377 12. Goto Y, *et al.* (2014) Innate lymphoid cells regulate intestinal epithelial cell glycosylation.  
378 *Science* 345(6202):1254009.

379 13. Goto Y, *et al.* (2015) IL-10-producing CD4(+) T cells negatively regulate fucosylation of  
380 epithelial cells in the gut. *Sci Rep* 5:15918.

381 14. Farin HF, *et al.* (2014) Paneth cell extrusion and release of antimicrobial products is  
382 directly controlled by immune cell-derived IFN-gamma. *J Exp Med* 211(7):1393-1405.

383

384
